# Supplementary material
Source: publisher site journal article supplement (https://www.dovepress.com/article/493841)
Supplement: Supplementary file 1 [file 493841%20Revised%20Supplementary%20Table%201.docx]

Supplementary Table 1: R package and script

| Package | Analysis | Script |
| --- | --- | --- |
| mice | Multiple Imputation | data <-mice (data, m = 5, seed = 123) |
| glmnet | LASSO regression | model <- glmnet (data, data_outcome, family = 'cox', nlambda = 100,alpha = 1)  cv_fit <- cv.glmnet (x=data, y= data_outcome, family="cox") |
| survival | Cox analysis | res.coxph <- coxph(Surv(time, ACM) ~ ., data = datacox)  res.coxph <- step(res.coxph, direction="both") |
| timeROC | Time-dependent ROC curves | roc <- timeROC(  T = roc_dat$time,  delta = roc_dat$ACM,  marker = roc_dat$scoren,  cause = 1,  weighting="marginal",  times = c(1*12, 3 * 12),  ROC = TRUE,  iid = TRUE) |
| survminer | Kaplan-Meier analysis | KM <- ggsurvplot (fit,  risk.table =TRUE,  pval ='p<0.001',  risk.table.col = "strata",  linetype = "strata",  legend.title = "Risk levels",  legend.labs=c("high risk", "low risk"),  pval.size=6,fontsize=4.5,  font.legend=14,  legend=c(0.9, 0.5),  pval.coord=c(0.15, 0.08),  risk.table.y.text.col = T,  risk.table.y.text = FALSE,  tables.height = 0.2,  tables.theme = theme_survminer(),  xlab ="Time in days", risk.table.height=.25,  ylab="Overall survival Probality",  data = data) |
| nom | Nomogram | nom <- nomogram (res.cph,  fun = list (surv1, surv2), lp=F,  fun.at = c (0.1, seq (0.1,0.9, by=0.2),0.99),  maxscale=100,  funlabel =c(‘1 year survival’, ‘3 year survival’)) |
| ggDCA | Decision curve analysis | dca <- dca (res.coxph, model.names ='Predictive model', times = c(12,36)) |
| rms | Calibration curves | cal <- calibrate (f1_test, cmethod='KM', method="boot", u=1*12, m=20, B=1000) |
| pwr | Post hoc analysis | pwr.2p2n.test(h = h, n1 = n1, n2 = n2, sig.level = 0.05, alternative = "two.sided") |
